# Supplementary material for: Sintering pressure as a “scalpel” to enhance the thermoelectric performance of MgAgSb
Source: Royal Society of Chemistry journal article supplement (doi:10.1039/d1tc05617d), 2022-01-01
Supplement: d1tc05617d1.pdf [file d1tc05617d1.pdf]

## Supporting Information:

### Sintering pressure as a “scalpel” to enhance the thermoelectric performance of MgAgSb

Yuntiao Liao<sup>a,1</sup>, Jun-Liang Chen<sup>b,1</sup>, Chengyan Liu<sup>c,\*</sup>, Jisheng Liang<sup>a</sup>, Qi Zhou<sup>a</sup>, Ping Wang<sup>a</sup>, Lei Miao<sup>a,c,d,\*</sup>

<sup>a</sup> School of Physical Science and Technology, Guangxi University, Nanning 530004, China

<sup>b</sup> School of Chemistry and Chemical Engineering, Guangxi University, Nanning 530004, China

<sup>c</sup> Engineering Research Center of Electronic Information Materials and Devices, Ministry of Education, Guangxi Key Laboratory of Information Material, Guilin University of Electronic Technology, Guilin 541004, China

<sup>d</sup> Department of Materials Science and Engineering, SIT Research Laboratories, Innovative Global Program, Faculty of Engineering, Shibaura Institute of Technology, Tokyo, 135-8548, Japan

\* Corresponding author.

E-mail addresses: lead contact: miaolei@guet.edu.cn (L. Miao);  
chengyanliu@guet.edu.cn (C. Liu).

<sup>1</sup>These authors contributed equally.

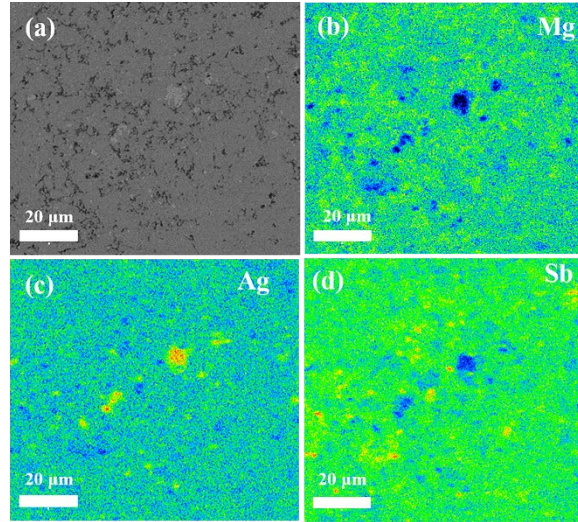

**Figure S1.** EPMA characterization of  $\text{MgAg}_{0.95}\text{Sb}_{0.99}$  samples. (a) A back scattering electron (BSE) image; (b–d) element mapping images of Mg, Ag, and Sb of the  $\text{MgAg}_{0.95}\text{Sb}_{0.99}$  sample sintered under the compressive pressure of 50 MPa.

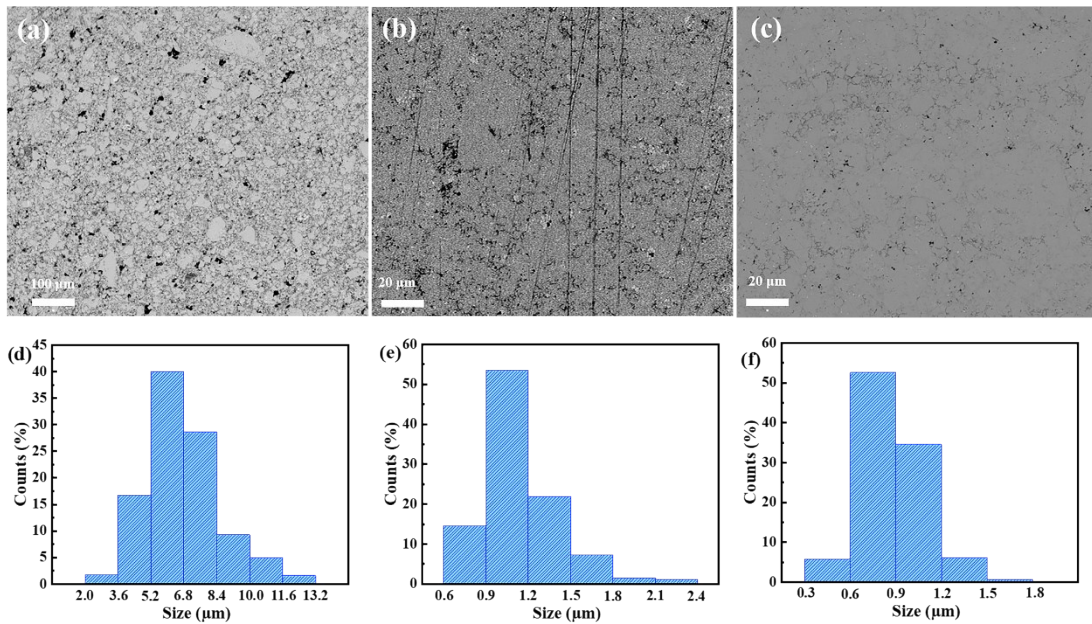

**Figure S2.** The back scattering electron image of  $\text{MgAg}_{0.95}\text{Sb}_{0.99}$  samples sintered under the compressive pressure for (a) 20 MPa, (b) 50 MPa, and (c) 80 MPa, respectively. The statistical results of pore size for  $\text{MgAg}_{0.95}\text{Sb}_{0.99}$  samples sintered under the compressive pressure for (d) 20 MPa, (e) 50 MPa, and (f) 80 MPa, respectively.

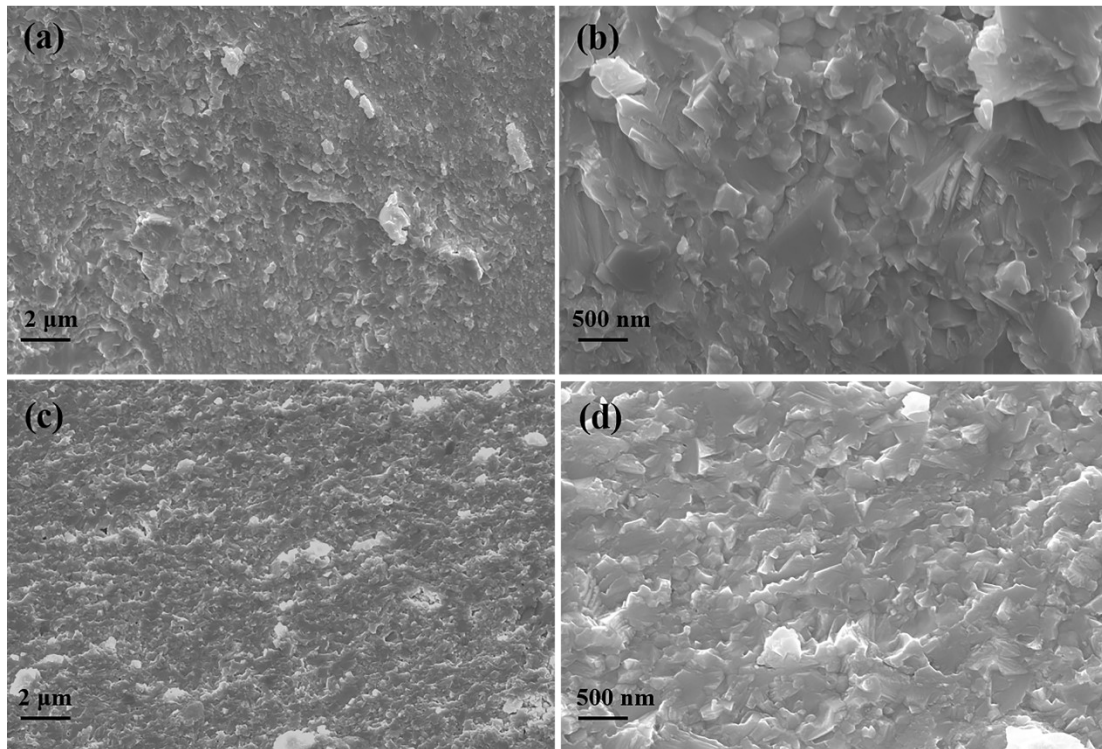

**Figure S3.** The SEM images of freshly fractured surface for MgAg<sub>0.95</sub>Sb<sub>0.99</sub> samples sintered under the axial compressive stress for (a) – (b) 80MPa, and (c) – (d) 100MPa, respectively.

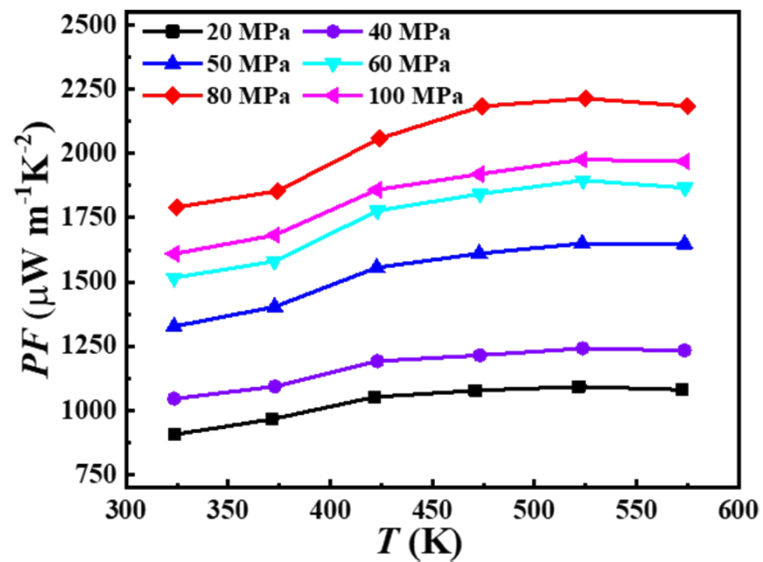

**Figure S4.** Temperature dependences of power factor of MgAg<sub>0.95</sub>Sb<sub>0.99</sub> samples sintered under the compressive pressure of 20 MPa, 40 MPa, 50 MPa, 60 MPa, 80 MPa and 100 MPa, respectively.

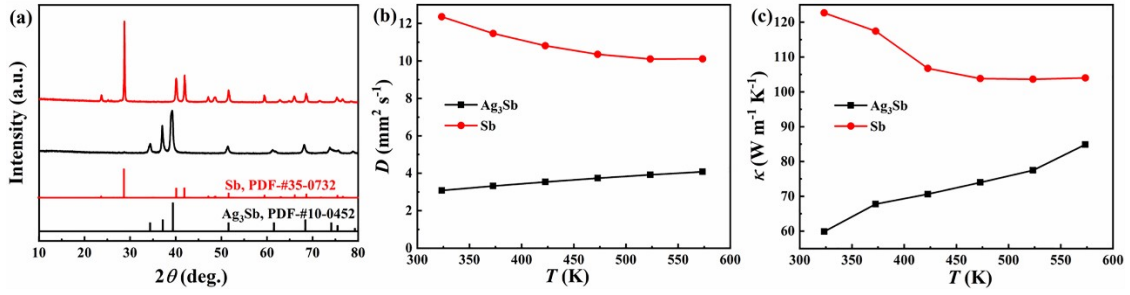

**Figure S5.** (a) XRD patterns of Sb and Ag<sub>3</sub>Sb. Temperature dependence of (b) diffusivity coefficient and (c) thermal conductivity for Sb and Ag<sub>3</sub>Sb, respectively.

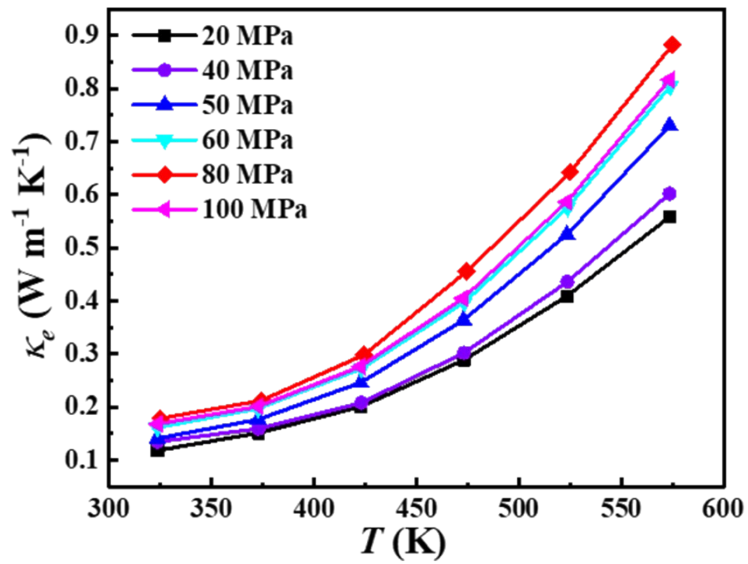

**Figure S6.** Temperature dependences of carrier thermal conductivity of MgAg<sub>0.95</sub>Sb<sub>0.99</sub> samples sintered under the compressive pressure of 20 MPa, 40 MPa, 50 MPa, 60 MPa, 80 MPa and 100 MPa, respectively.

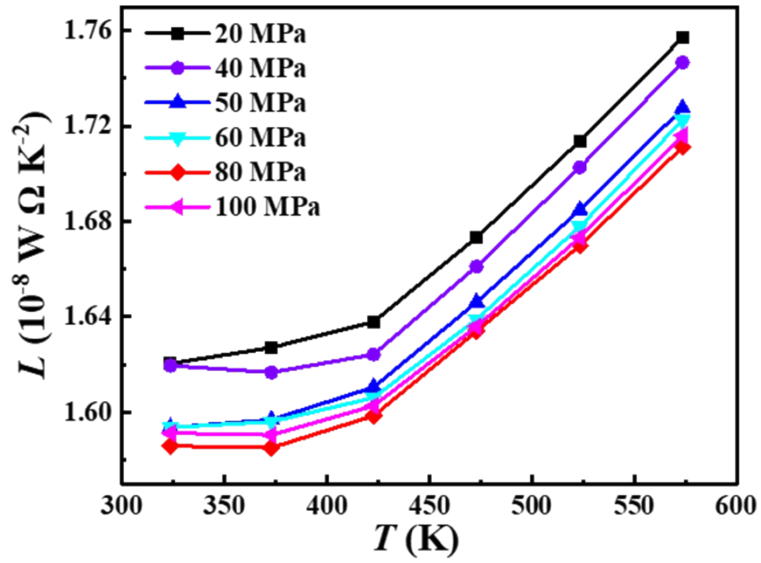

**Figure S7.** Temperature-dependent Lorentz number of  $\text{MgAg}_{0.95}\text{Sb}_{0.99}$  samples sintered under the compressive pressure for 20 MPa, 40 MPa, 50 MPa, 60 MPa, 80 MPa and 100 MPa, respectively.

**Table S1**

The full width half maximum (FWHM) and grain size of  $\text{MgAg}_{0.95}\text{Sb}_{0.99}$  samples sintered under the compressive pressure for 20 MPa, 40 MPa, 50 MPa, 60 MPa, 80 MPa and 100 MPa, respectively.

| Samples                              | sintering pressure (MPa) | Crystallographic planes | FWHM (deg.) | Grain size (nm) |
|--------------------------------------|--------------------------|-------------------------|-------------|-----------------|
| $\text{MgAg}_{0.95}\text{Sb}_{0.99}$ | 20                       | (022)                   | 0.160       | 51.19           |
| $\text{MgAg}_{0.95}\text{Sb}_{0.99}$ | 40                       | (022)                   | 0.151       | 53.18           |
| $\text{MgAg}_{0.95}\text{Sb}_{0.99}$ | 50                       | (022)                   | 0.135       | 59.48           |
| $\text{MgAg}_{0.95}\text{Sb}_{0.99}$ | 60                       | (022)                   | 0.128       | 62.74           |
| $\text{MgAg}_{0.95}\text{Sb}_{0.99}$ | 80                       | (022)                   | 0.124       | 64.76           |
| $\text{MgAg}_{0.95}\text{Sb}_{0.99}$ | 100                      | (022)                   | 0.132       | 60.84           |

**Table S2**

The density, relative density and porosity of  $\text{MgAg}_{0.95}\text{Sb}_{0.99}$  samples sintered under the compressive pressure for 20 MPa, 40 MPa, 50 MPa, 60 MPa, 80 MPa and 100 MPa, respectively.

| Samples                              | Sintering pressure (MPa) | Density ( $\text{g cm}^{-3}$ ) | Relative density (%) | Porosity |
|--------------------------------------|--------------------------|--------------------------------|----------------------|----------|
| $\text{MgAg}_{0.95}\text{Sb}_{0.99}$ | 20                       | 5.427                          | 86.01                | 13.99    |
| $\text{MgAg}_{0.95}\text{Sb}_{0.99}$ | 40                       | 5.721                          | 90.67                | 9.33     |
| $\text{MgAg}_{0.95}\text{Sb}_{0.99}$ | 50                       | 5.903                          | 93.55                | 6.45     |

|                                         |     |       |       |      |
|-----------------------------------------|-----|-------|-------|------|
| MgAg <sub>0.95</sub> Sb <sub>0.99</sub> | 60  | 6.005 | 95.11 | 4.89 |
| MgAg <sub>0.95</sub> Sb <sub>0.99</sub> | 80  | 6.055 | 95.95 | 4.05 |
| MgAg <sub>0.95</sub> Sb <sub>0.99</sub> | 100 | 6.109 | 96.81 | 3.19 |

## The Lorenz number $L$ calculation

In this work, the scattering parameter  $r$  is assumed to be  $-0.5$  and the Lorenz number  $L$  is deduced from the measured Seebeck coefficient  $\alpha$  based on the single parabolic band model using the following equations<sup>1,2</sup>:

$$\alpha = \pm \frac{k_B}{e} \left( \frac{(r + 5/2)F_{r+3/2}(\xi)}{(r + 3/2)F_{r+1/2}(\xi)} - \xi \right) \quad (1)$$

$$L = \left( \frac{k_B}{e} \right)^2 \left( \frac{(r + 7/2)F_{r+5/2}(\xi)}{(r + 3/2)F_{r+1/2}(\xi)} - \left[ \frac{(r + 5/2)F_{r+3/2}(\xi)}{(r + 3/2)F_{r+1/2}(\xi)} \right]^2 \right) \quad (2)$$

$$F_n(\xi) = \int_0^{\infty} \frac{x^n}{1 + e^{x-\xi}} dx \quad (3)$$

$$\xi = \frac{E_F}{k_B T} \quad (4)$$

where  $E_F$  is the Fermi energy,  $\xi$  is the reduced Fermi energy,  $k_B$  is the Boltzmann constant,  $e$  is the electron charge, and  $F_n(\xi)$  is the Fermi integration. The obtained  $L$  is plotted in Figure S7.

## References

1. L. Zhao, S. Lo, J. He, H. Li, K. Biswas, J. Androulakis, C. I. Wu, T. P. Hogan, D. Chung, V. P. Dravid, M. G. Kanatzidis, High performance thermoelectrics from earth-abundant materials: enhanced figure of merit in PbS by second phase nanostructures, *J. Am. Chem. Soc.*, **2011**, 133, 20476-87.
2. Z. Liu, J. Shuai, J. Mao, Y. Wang, Z. Wang, W. Cai, J. Sui and Z. Ren, Effects of antimony content in MgAg<sub>0.97</sub>Sb<sub>x</sub> on output power and energy conversion efficiency, *Acta Mater.*, **2016**, 102, 17-23.
